# Supplementary material
Source: Springer Nature journal article supplement (https://www.springermedizin.de/resource/supplementary/12998_2007_76_MOESM9_ESM.pdf/9623536)

# Trigger Point CONSORT Flowchart

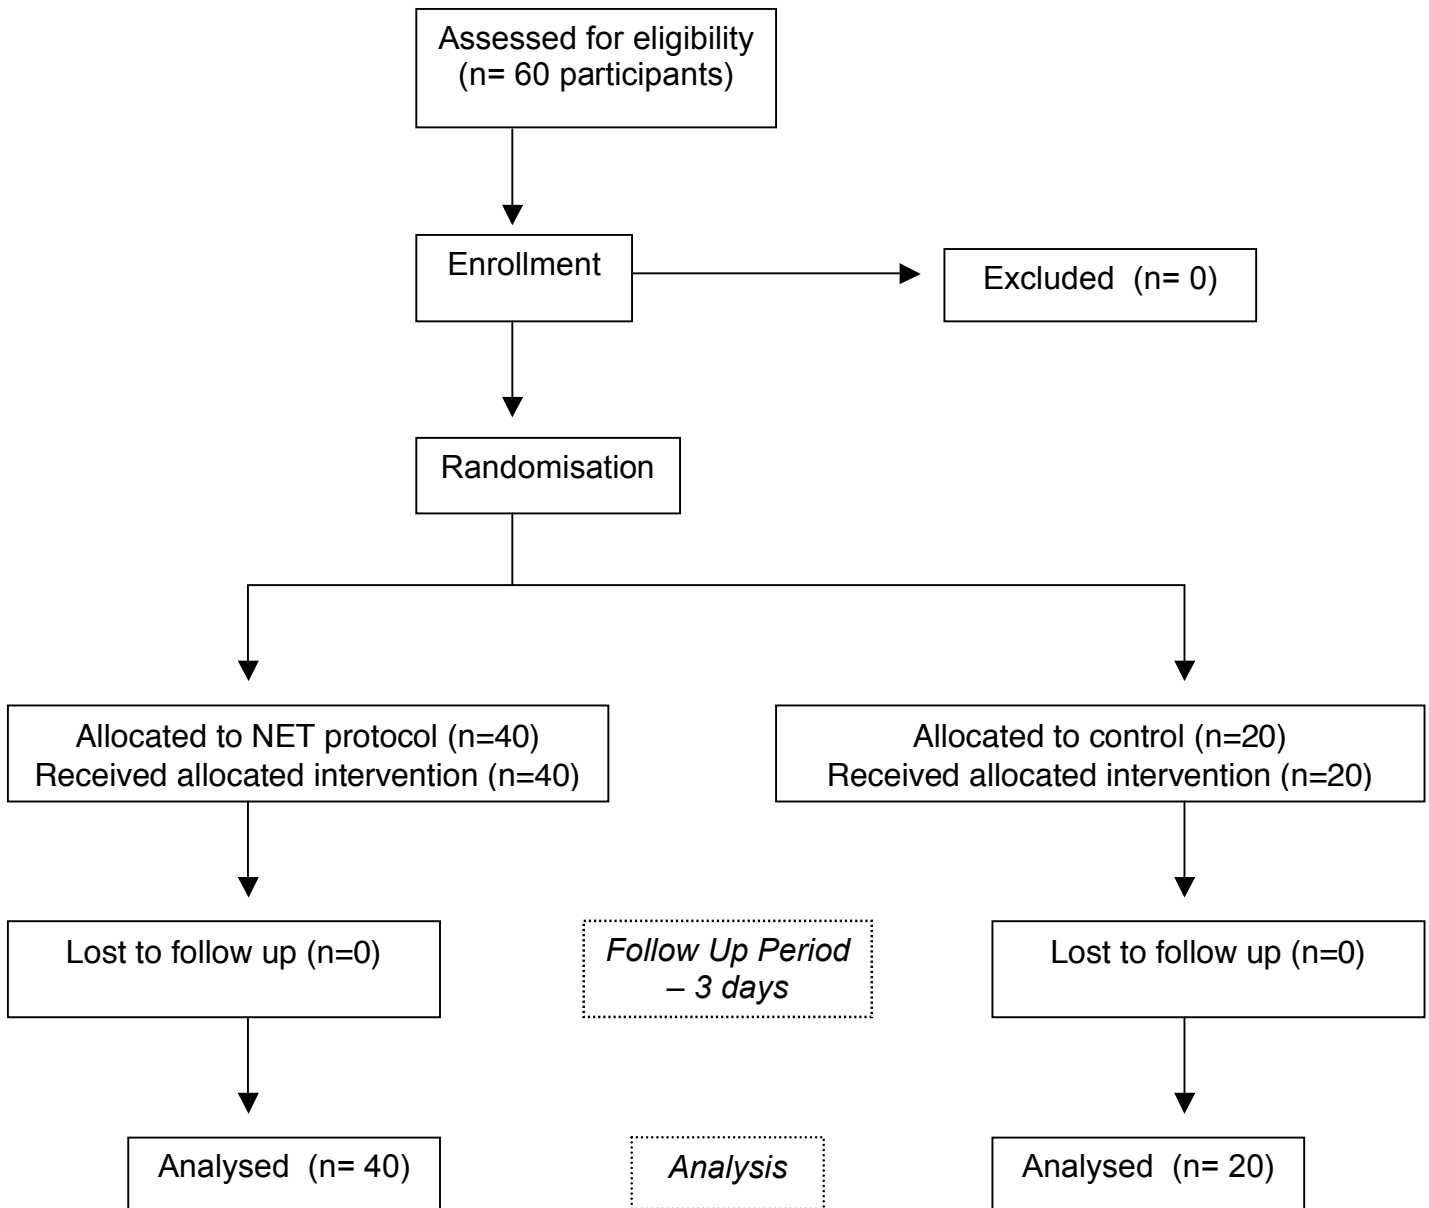

Supplement: MOESM9 [file 9623536]
